# Supplementary material for: Development of New Resolvin D1 Analogues for Osteoarthritis Therapy: Acellular and Computational Approaches to Study Their Antioxidant Activities
Source: Preprints.org preprint supplement (doi:10.20944/preprints202402.1255.v1), 2024-02-22
Supplement: Supplementary file 1 [file supplementary]

**Supplementary information**

**Development of New Resolvin D1 Analogues: Acellular and Computational Approaches to Study Their Antioxidant Activities**

Zahra Kariminezhad1, Candice Dulong1, Mahdi Rahimi1, Julio Fernandes1, René Maltais2, Jean-Yves Sancéau2, Donald Poirier2,3, Hassan Fahmi4, Mohamed Benderdour1*

|  |
| --- |

1 Orthopedic Research Laboratory, Hôpital du Sacré-Cœur de Montréal, Université de Montréal, Montréal, Qc, Canada.

2 Department of Molecular Medicine, Faculty of Medicine, Université Laval, Québec, QC, Canada.

3 Organic Synthesis Service, Medicinal Chemistry Platform, CHU de Québec Research Center-Université Laval, Québec, QC, Canada.

4 Osteoarthritis Research Unit, University of Montreal Hospital Research Center (CRCHUM), Montreal, QC, Canada

***** Correspondence email: mohamed.benderdour@umontreal.ca; Tel.: (514 338- 2222 #3279)

**RvD1 analogue 1:**

**
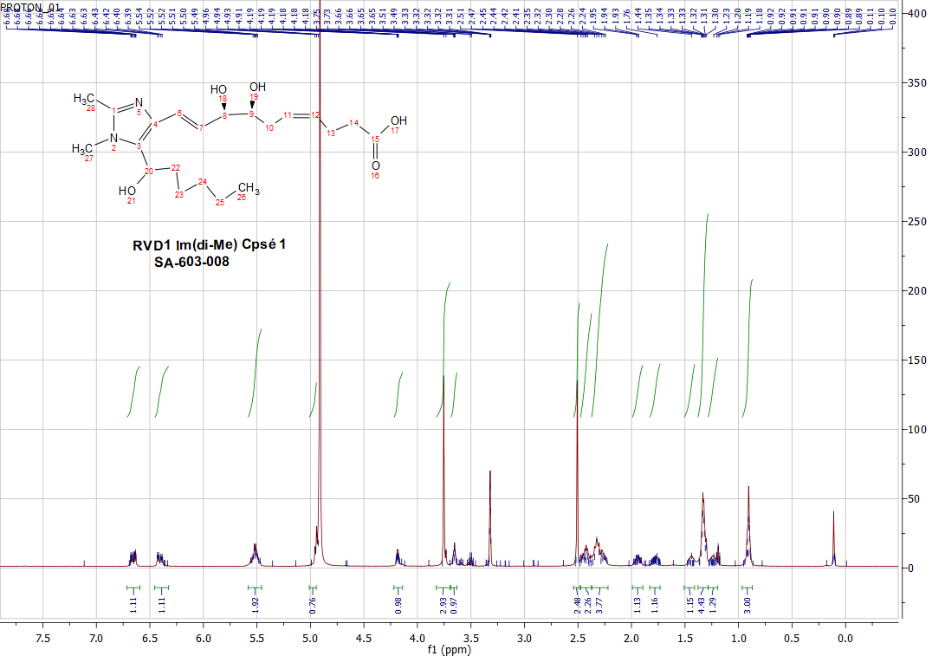
**

**Figure S1:** 1H NMR spectrum analogue 1

**
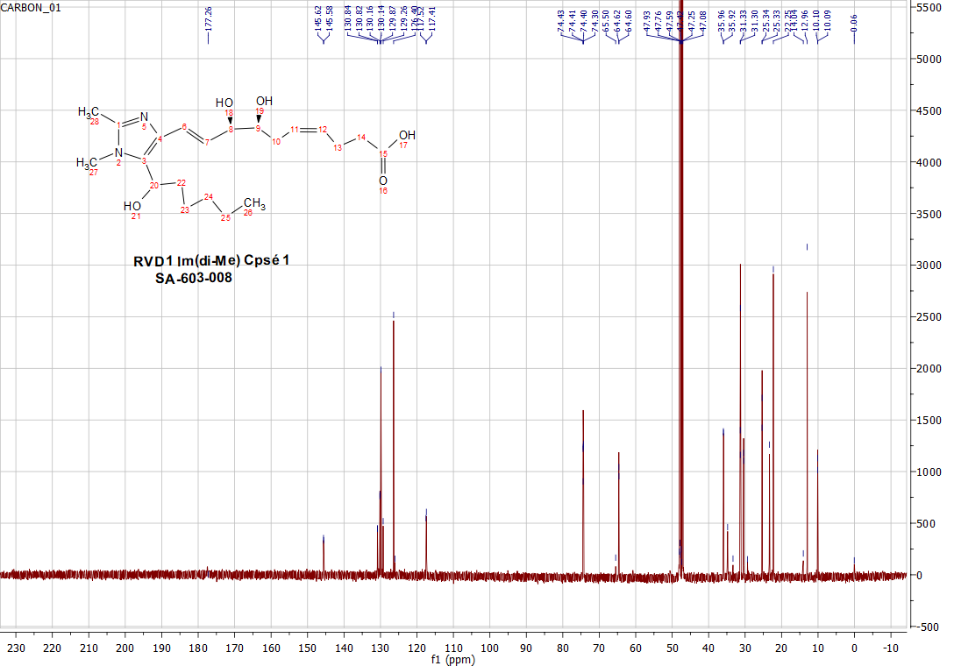
**

**Figure S2:** 13C NMR spectrum analogue 1


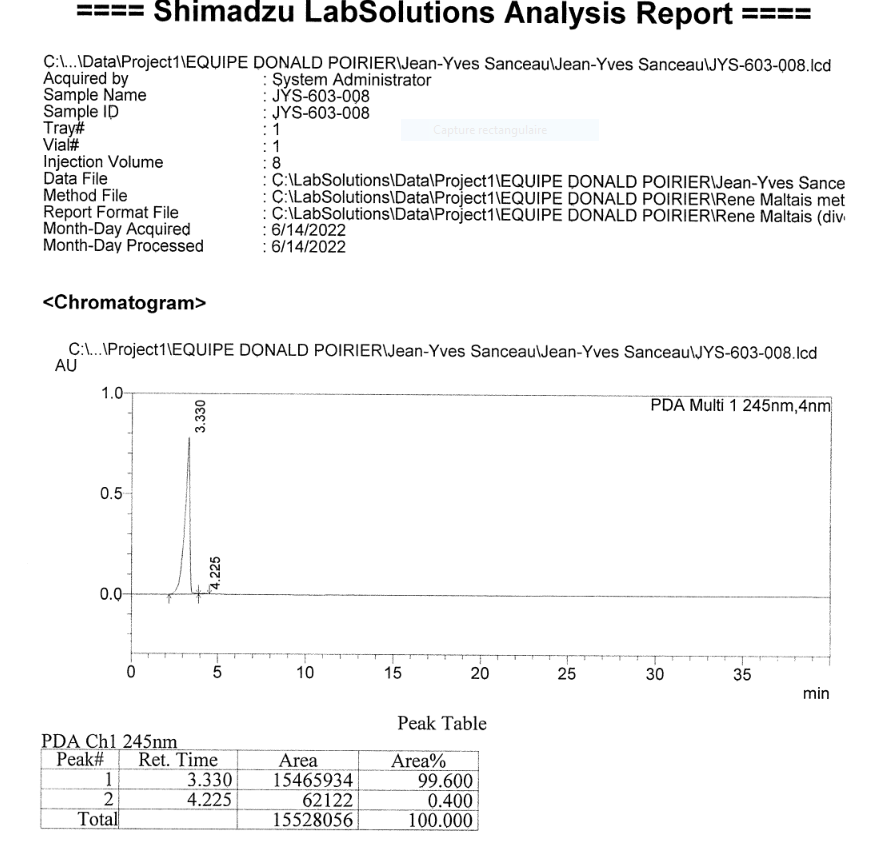


**Figure S3:** LCMS chromatogram analogue 1


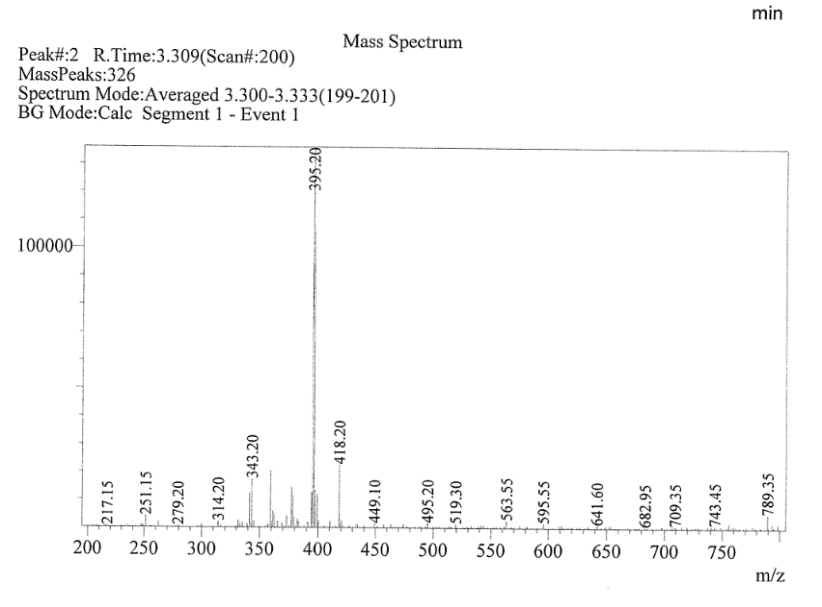


**Figure S4:** Mass spectrum analogue 1

**RvD1 analogue 2:**


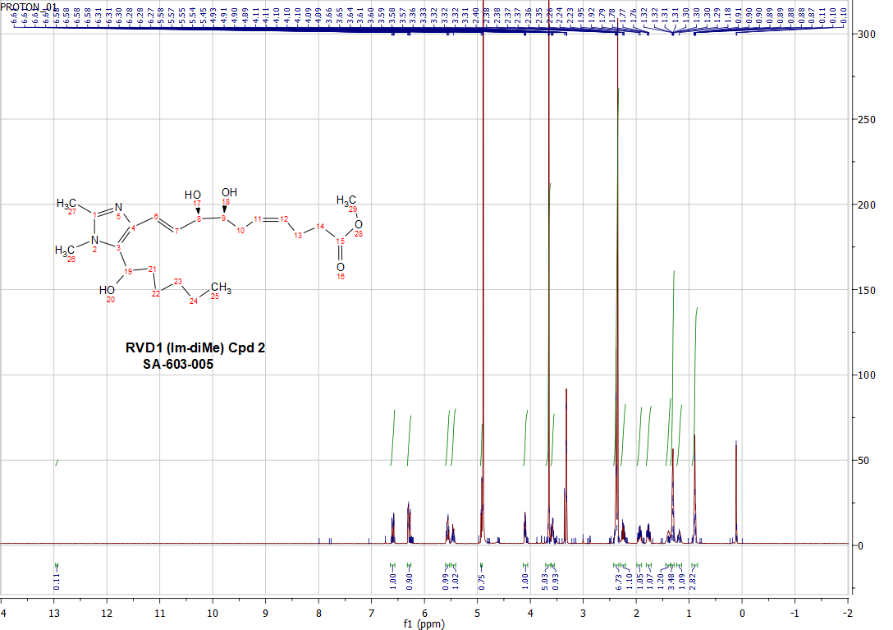


**Figure S5:** 1H NMR spectrum analogue 2


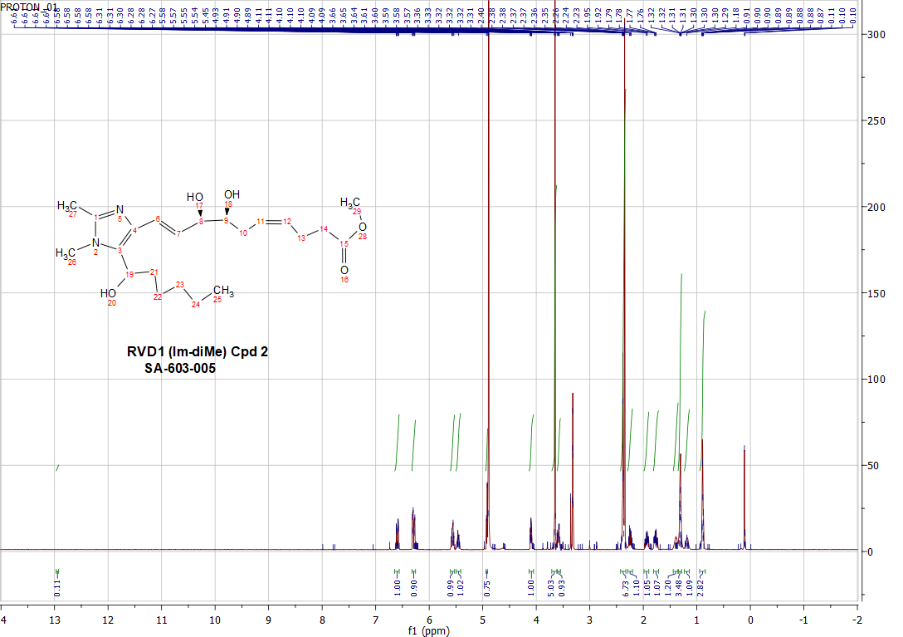


**Figure S6:** 13C NMR spectrum analogue 2


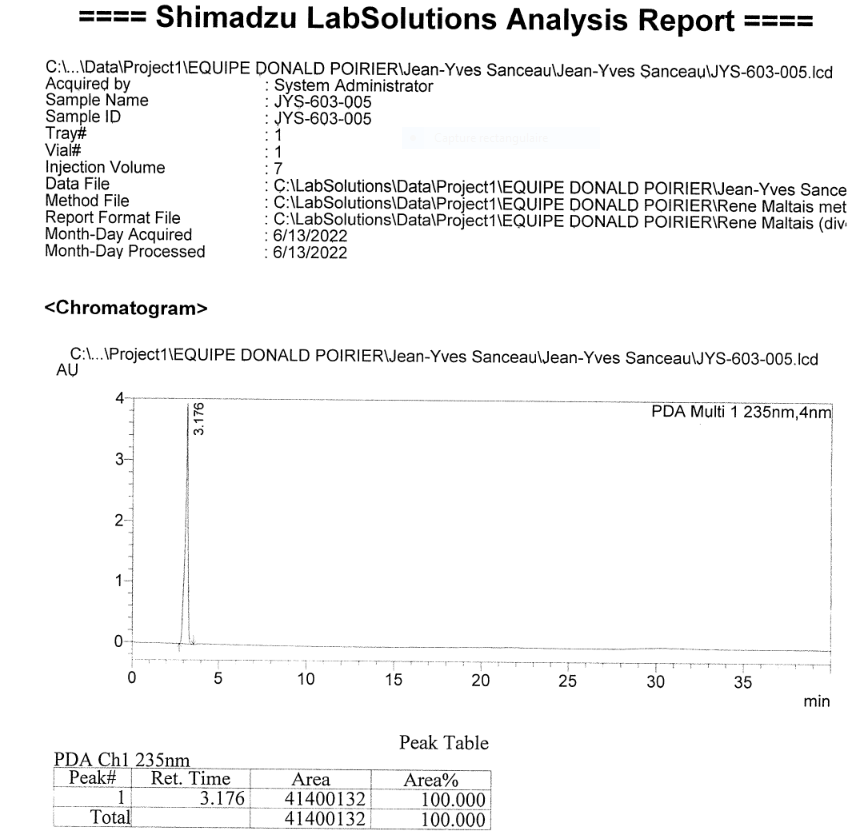


**Figure S7:** LCMS chromatogram analogue 2


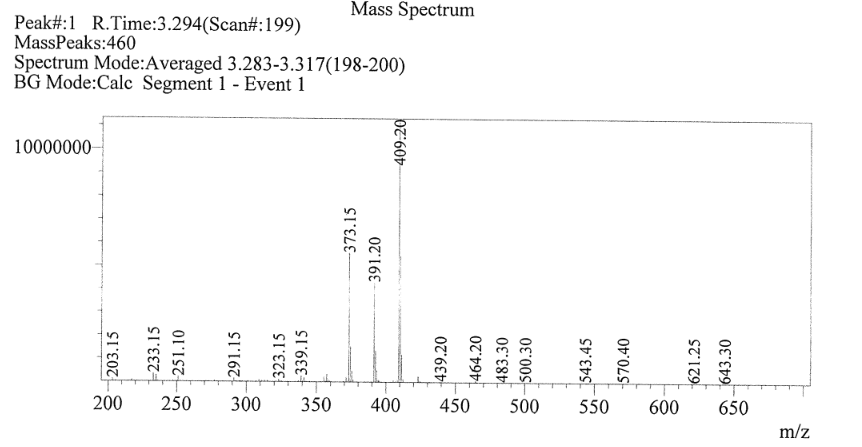


**Figure S8**: Mass spectrum analogue 2

**Mulliken Charge Distribution:**


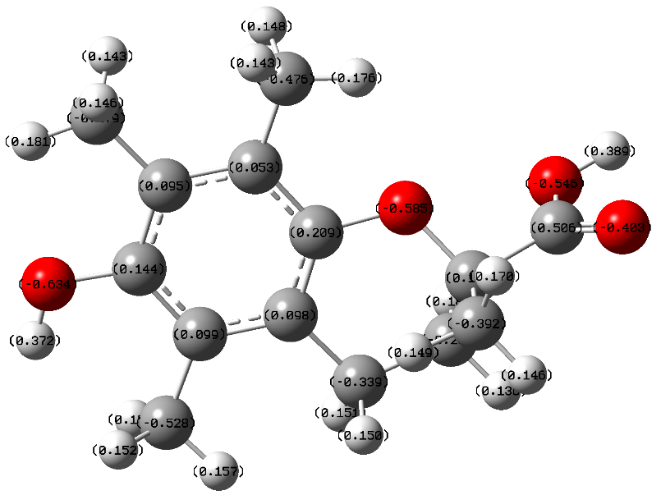


**Figure S9:** Mulliken charge distribution for Trolox


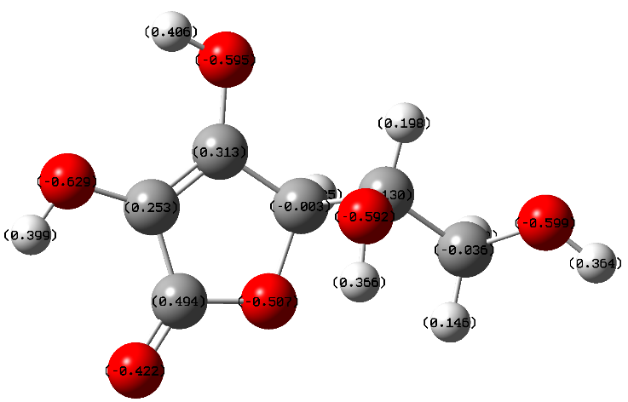


**Figure S10:** Mulliken charge distribution for Ascorbic Acid


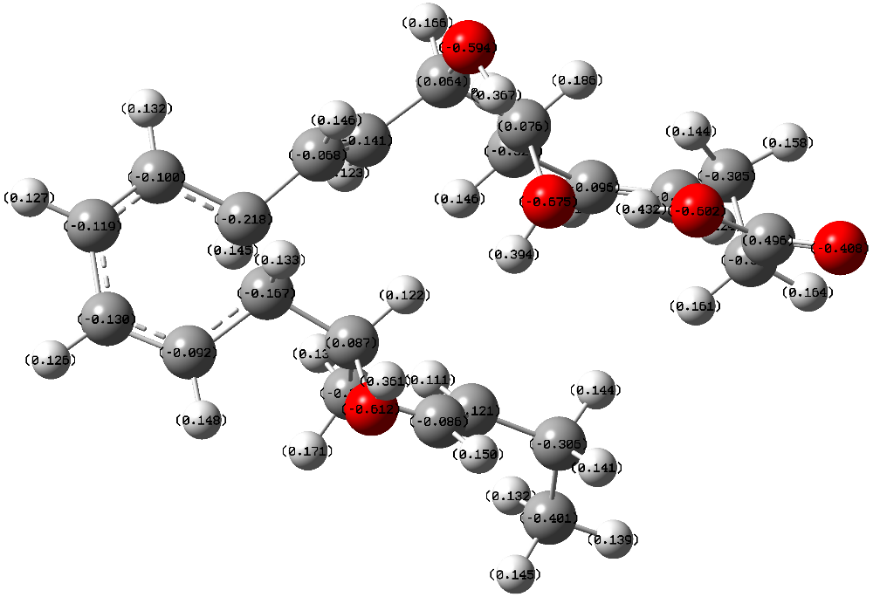


**Figure S11:** Mulliken charge distribution for ResolvinD1


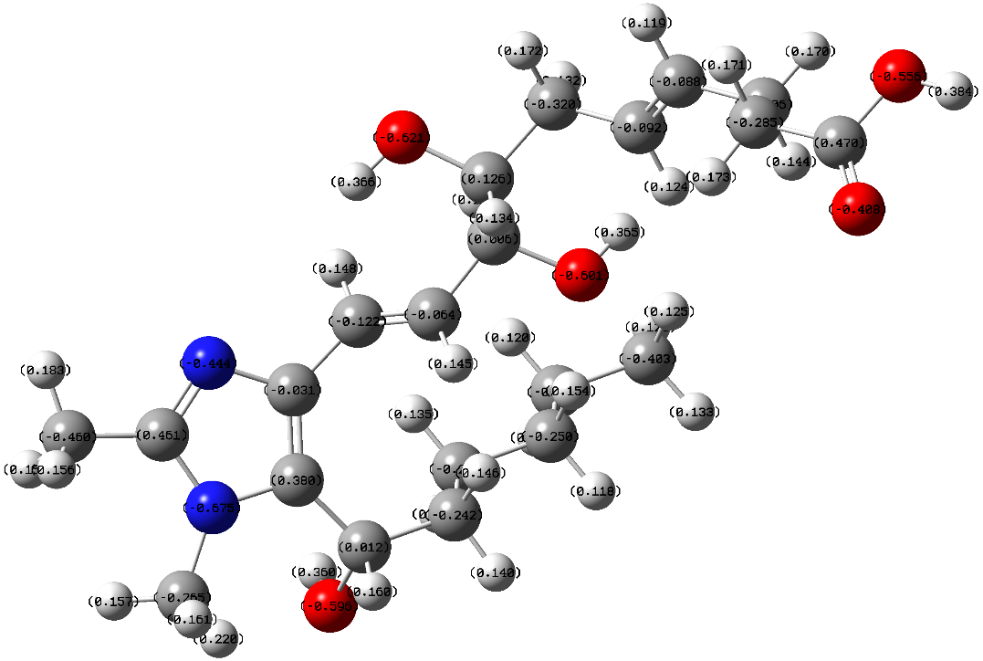


**Figure S12:** Mulliken charge distribution for analogue 1


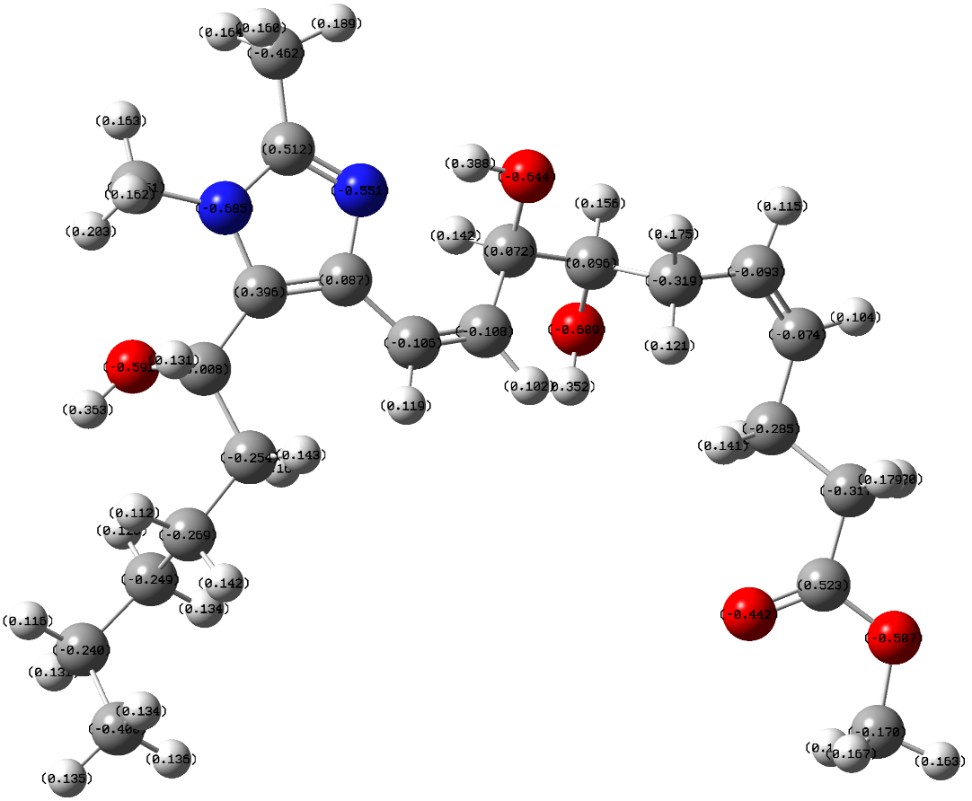


**Figure S13:** Mulliken charge distribution for analogue 2
